# Supplementary material
Source: PubMed Central journal article supplement (PMC3581969)
Supplement: 1215722110_pnas.201215722SI.pdf [file 1215722110_pnas.201215722SI.pdf]

# Supporting Information

Mor and Cohen 10.1073/pnas.1215722110

## SI Methods

**Gene Array Experiments.** Human CD4 T cells were isolated as described, and incubated in 24-well plates (Nunc),  $4 \times 10^6$  cells/mL with plate-bound anti-human CD3 (OKT3) at 2  $\mu\text{g}/\text{mL}$ . The stimulation was performed in RPMI medium supplemented with 0.1% BSA. After 2 h of stimulation with or without cefuroxime (50  $\mu\text{g}/\text{mL}$ ) or ampicillin (50  $\mu\text{g}/\text{mL}$ ), cells were collected washed and suspended in TRI Reagent (Molecular Research Center). RNA was extracted from samples and used to prepare probes for gene array in accord with the manufacturer's instructions (Super-Array Bioscience). Adequate labeling of the probes was tested before hybridization. Three healthy donors were tested in stimulation with cefuroxime. The membranes were analyzed online with the Image Data Acquisition and Expression Analysis (Super-Array Bioscience).

**Real-Time PCR Analysis.** To verify the results of the gene array, we synthesized real-time PCR primers (designed with the Light-Cycler probe design software; Roche). Real-time PCR of six selected genes was performed using a LightCycler (Roche). RNA was reverse-transcribed to cDNA from 1  $\mu\text{g}$  of total RNA, which was then subjected to quantitative RT-PCR performed essentially according to the manufacturer's instructions. Specific primer pairs were used to amplify specific genes in the presence of 3 mM  $\text{MgCl}_2$ . PCR was performed in triplicate in a total volume of 20  $\mu\text{L}$  of LightCycler HotStart DNA SYBR Green I mix (Roche)

containing primer and 5  $\mu\text{L}$  of cDNA. PCR amplification was preceded by incubation of the mixture for 10 min at 95  $^\circ\text{C}$ , and the amplification step consisted of 45 cycles of denaturation, annealing, and extension. Denaturation was performed for 15 s at 95  $^\circ\text{C}$ ; annealing was performed in 60  $^\circ\text{C}$ ; and the extension was performed at 72  $^\circ\text{C}$  for 20 s, with fluorescence detection at 72  $^\circ\text{C}$  after each cycle. After the final cycle, melting-point analyses of all samples were performed within the range of 62–95  $^\circ\text{C}$  with continuous fluorescence detection. A standard curve was generated from one sample in each run. Expression levels of  $\beta$ 2-microglobulin (B2M) were used for sample normalization ( $\beta$ -actin levels were affected by cefuroxime treatment). The primer sequences were B2M sense TAGCTCTAGGAGGGCTG antisense ACCACAACCATGCCTTA; ACVR2 sense ATCTCCGCGTAAGGAA, antisense TGGGACTAACAATCGTG; CCR4 sense TCCTAGAGACCCTGGTG, antisense GGACTGCGGTG-TAAGATG; JAK1 sense AGGAGTATTACACCGTCAAG, antisense GGGTTGGGCCTATCAT; STAT4 sense ACATCCTGCGAGACTAC, antisense CACCGCATAACACTT; TLR2 sense CTTCTGGAGCCCATTG, antisense ACGGTACATCC-ACGTAG; NFkBIE sense GACTTTGTGGTAGAGGCA, antisense AAAACGTGGAGTCAGC. Results for each gene are presented as the relative expression level compared with B2M. Comparison between membranes was performed after normalization in accord with the manufacturer instructions.

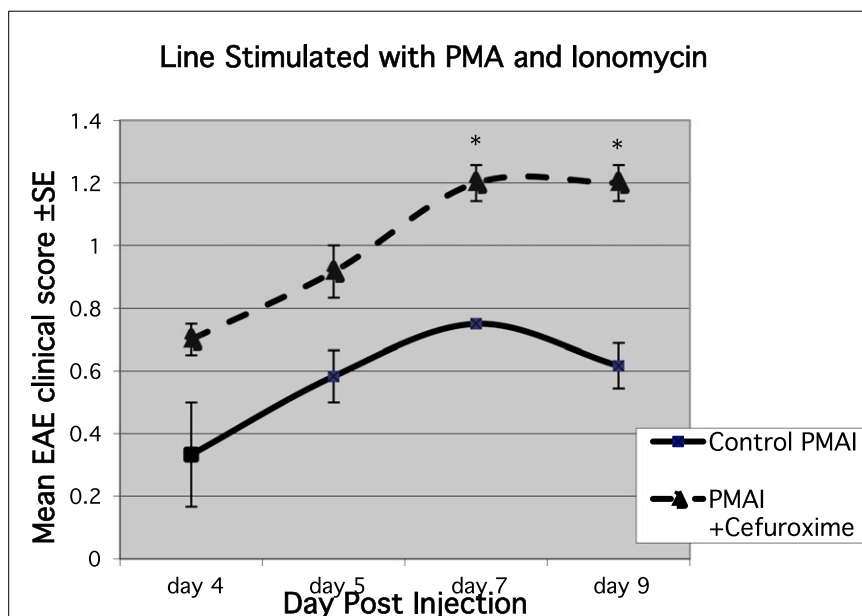

**Fig. S1.** Cefuroxime enhances line-induced experimental autoimmune encephalomyelitis (EAE) in the absence of antigen-presenting cells. Encephalitogenic T-cell line was stimulated for 3 d with phorbol myristate acetate (50 ng/mL) and ionomycin (500 ng/mL) with or without cefuroxime (50  $\mu\text{g}/\text{mL}$ ). Following stimulation,  $10^7$  cells were injected to Lewis rats, and EAE signs were recorded. Asterisks indicate significant ( $P < 0.05$ ) changes between cefuroxime and control groups.

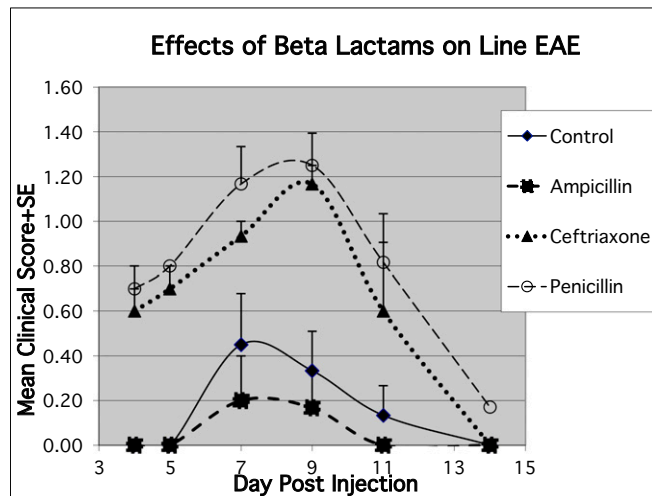

Fig. S2. Effects of beta lactams on BP10 line induced EAE in Lewis rats. Groups of rats, four each, were injected i.p. with  $10^7$  BP10 line cells stimulated in the presence of indicated antibiotics (50  $\mu\text{g}/\text{mL}$ ). Disease scores were determined. Ceftriaxone and penicillin enhanced disease scores, whereas ampicillin did not augment EAE.

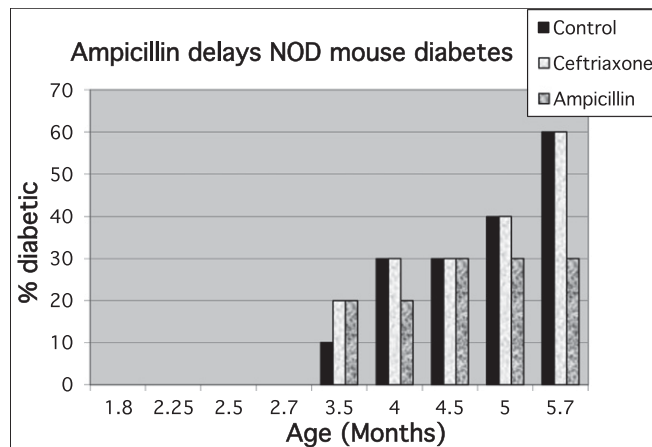

Fig. S3. Inhibition of type I diabetes in nonobese diabetic mice by ampicillin treatment. Mice were injected with ceftriaxone 675  $\mu\text{g}$  or ampicillin 1,350  $\mu\text{g}$  weekly, and were followed for the development of diabetes, marked by blood sugar above 300 mg/dL on two measurements.

Table S1. Clinical uses of beta-lactams studied

| Beta Lactam      | Family                          | Spectrum                                                                                                                                                        |
|------------------|---------------------------------|-----------------------------------------------------------------------------------------------------------------------------------------------------------------|
| Benzylpenicillin | Penicillin                      | <i>Streptococcus</i>                                                                                                                                            |
| Ampicillin       | Penicillin                      | <i>Streptococcus</i> , plus <i>Listeria monocytogenes</i> , <i>Enterococcus</i> species, <i>Proteus mirabilis</i> , and some strains of <i>Escherichia coli</i> |
| Cefuroxime       | Cephalosporin second generation | <i>Moraxella catarrhalis</i> , <i>E. coli</i> , <i>P. mirabilis</i> , and <i>Klebsiella</i> species                                                             |
| Ceftriaxone      | Cephalosporin third generation  | Expanded coverage of Gram-negative organisms; enhanced coverage of <i>Proteus vulgaris</i> and <i>Providencia</i> species                                       |

**Table S2. Effects of cefuroxime and ampicillin on gene expression by CD4+ human T cells**

| Gene                                       | Full name                                                      | % decrease by cefuroxime* | % increase by ampicillin | Function†                                 | Th1/Th2‡                                                      |
|--------------------------------------------|----------------------------------------------------------------|---------------------------|--------------------------|-------------------------------------------|---------------------------------------------------------------|
| Chemokines, cytokines, and their receptors |                                                                |                           |                          |                                           |                                                               |
| CCR4                                       | Chemokine receptor 4                                           | 39 ± 2                    | +31                      | Chemokine receptor                        | Expressed on Th2 cells (1) and on diabetogenic T cells (2)    |
| CCR6                                       | C-C chemokine receptor 6                                       | 53 ± 5.6                  | +83                      | -"                                        | Expressed on T-regulatory (3)                                 |
| CCR7                                       | Chemokine receptor 7                                           | 38 ± 8.1                  | +43                      | Bind CCL21                                | Expressed in EAE (4)                                          |
| CCL5                                       | Chemokine                                                      | 21 ± 5.6                  | +25                      | Monocyte memory T eosinophils             | Expressed in EAE lesion (5)                                   |
| CXCL10                                     | Chemokine                                                      | 39 ± 3                    | +25                      | CXCR3 the receptor<br>Attracts Th1 cells  | Anti-exacerbation EAE (6)<br>Anti protects EAE (7) and DM (8) |
| LTA                                        | Lymphotoxin alpha                                              | 17 ± 10                   | +48.5                    | Cytokine                                  | Blocking exacerbates arthritis, Th1 (9)                       |
| TNF                                        |                                                                | 29 ± 8.5                  | +39                      | Cytokine                                  | Th1, K/O mice severe EAE (10)                                 |
| CCL11                                      | Eotaxin, binds CCR3                                            | 18 ± 6.6                  | +107                     | Cytokine                                  | Th2 attracts eosinophils (11)                                 |
| SDF2                                       | Stromal cell-derived factor                                    | 28 ± 12                   | +71                      | Secreted                                  | ??                                                            |
| IL-16                                      | Lymphocyte chemoattractant factor                              | 50 ± 7.8                  | +14A low expression      |                                           | Treg (12)                                                     |
| IL-1B                                      | Cytokine                                                       | 54 ± 7.0                  | +64A low expression      |                                           | Proinflammatory (13).                                         |
| IL-9R                                      | Receptor                                                       | 27.5 ± 3                  | No change                | Receptor                                  | Th9 (14)                                                      |
| TNFRSF11A                                  | Tumor necrosis factor receptor superfamily, activator of NF-κB | 43 ± 2                    | +81A low expression      | Membrane                                  | ??                                                            |
| IL-2RB                                     | Surface                                                        | 50 ± 9.9                  | +93                      | Binds IL-2                                |                                                               |
| IL-2RG                                     | Receptor                                                       | 57 ± 9.8                  | +78A low expression      |                                           |                                                               |
| Surface receptors                          |                                                                |                           |                          |                                           |                                                               |
| TLR2                                       | Receptor                                                       | 52 ± 14                   | +419 A low expression    |                                           | EAE Exp in Treg (15)                                          |
| CD28                                       | Surface                                                        | 51 ± 2.1                  | +175                     | Bind B7-1                                 | Treg (16)                                                     |
| SELL                                       | Selectin L                                                     | 46 ± 7.0                  | +124                     | Adhesion to high endothelial venules      | ?Th1 (17)                                                     |
| TGF-β related                              |                                                                |                           |                          |                                           |                                                               |
| ACVR2                                      | Activin receptor II                                            | 60 ± 14.8                 | +85A low expression      | Activin is TGF-β-like                     |                                                               |
| ACVR1                                      | Activin receptor 1                                             | 42 ± 0.7                  | +53A low expression      | Activin is TGF-β-like                     |                                                               |
| TGIF                                       |                                                                | 43 ± 3.5                  | +72A low expression      | Trans factor repress SMAD2, 3             | Anti-Th2                                                      |
| TGFBR3                                     | Receptor                                                       | 44 ± 3.5                  | +139                     |                                           | Regulatory                                                    |
| SMAD7                                      | Inhibits TGF-β                                                 | 47 ± 4.2                  | +34A low expression      |                                           |                                                               |
| SMAD4                                      | TGF-β signal transduction path                                 | 47 ± 7.0                  | +85                      |                                           |                                                               |
| Kinases, signal transduction               |                                                                |                           |                          |                                           |                                                               |
| MAP3K2                                     | Kinase                                                         | 36 ± 12                   | +93                      | Reg JNK ERK5                              | ??                                                            |
| MAP3K7                                     | Kinase                                                         | 46 ± 9.9                  | +124                     | TGF-β signaling NF-κB activation p38 MAPK | ??                                                            |
| MAP3K1                                     | Kinase                                                         | 53 ± 12                   | +63A low expression      | Activates ERK JNK                         | ??                                                            |
| MAP2K4                                     | Kinase                                                         | 52 ± 14.1                 | +150                     |                                           | ?Th1 (18)                                                     |
| MAPK9                                      | Kinase JNK2                                                    | 42 ± 10.9                 | +46                      |                                           | Th1 (19) No effect on EAE (20)                                |
| PAK1                                       | Kinase                                                         | 40 ± 2.4                  | +111                     | JNK apoptosis                             | ??                                                            |
| IRAK1                                      | Kinase                                                         | 44 ± 2.1                  | +171                     |                                           | Th1 (21)<br>IL-10 (22)                                        |
| JAK1                                       | Janus kinase 1                                                 | 53 ± 13.4                 | +161                     | INF-α, -β, -γ transduction                | Th1 (23) and IL-4                                             |
| Transcription factors                      |                                                                |                           |                          |                                           |                                                               |
| NFKB1                                      |                                                                | 43 ± 3.5                  | +31                      | Transfer factor                           | Inhibit NF-κB Th2 (24)                                        |
| NFKB2                                      | Transcription factor                                           | 53 ± 10.6                 | +195                     | Lymphoma                                  | ??                                                            |
| NFKBIL1                                    | Transcription factor                                           | 54 ± 12.5                 | +191                     | ??                                        | ??                                                            |

**Table S2. Cont.**

| Gene          | Full name                                 | % decrease by cefuroxime* | % increase by ampicillin | Function†                            | Th1/Th2‡                                                |
|---------------|-------------------------------------------|---------------------------|--------------------------|--------------------------------------|---------------------------------------------------------|
| NFKBIE        | Inhibits NF-κB                            | 63 ± 11                   | +132                     |                                      | ??                                                      |
| SRF           | Serum response factor                     | 38 ± 1.9                  | +58                      | Transfer factor                      | ??                                                      |
| EGR3          | Early growth response3                    | 38 ± 2.8                  | -25                      | Transfer factor                      | Mitogenic activation induced in T cells, FAS-L exp (25) |
| JUN           |                                           | 49 ± 2.2                  | +65                      | Interacts with c-Fos to form a dimer | Th2 (26)                                                |
| RFXAP         | Regulatory factor X-associated protein    | 27 ± 12                   | +131                     | MHCII expression                     | ??                                                      |
| CREB1         | cAMP-responsive element binding protein 1 | 19 ± 4.9                  | +101                     | Transfer factor                      | ??                                                      |
| YY1           | Yin Yang 1                                | 23 ± 9.1                  | +152                     | Transfer factor                      | Th2 (27) activates IL-4                                 |
| REL           | Transcription factor                      | 45 ± 1.9                  | +132                     |                                      | Th1 IL-12 (28)                                          |
| TRAF6         | TNF receptor-associated factor 6          | 43 ± 3.5                  | +39A low expression      | NF-κB and JNK activate               | Limit Th2 (29)                                          |
| TRAF5         |                                           | 43 ± 2.2                  | +47A low expression      |                                      | Limit Th2 (30)                                          |
| STAT1         |                                           | 32 ± 11                   | +85                      |                                      | Reg T Th1 (31)                                          |
| CREBBP        | Acetylates nuclear protein                | 40 ± 9.9                  | +49                      |                                      |                                                         |
| RFX5          | MHCII express                             | 36 ± 4.2                  | +137                     |                                      |                                                         |
| STAT4         | Transcription factor                      | 47 ± 9.3                  | +11                      |                                      | Th1 (32)<br>Th2                                         |
| SP3           | Transcription factor                      | 39 ± 9.9                  | +47                      | IL-10 control                        |                                                         |
| STAT6         | Transcription factor                      | 47 ± 7.9                  | No change                |                                      | Th2 IL4 (33)                                            |
| GFI1          | Growth factor independent 1               | 45 ± 14                   | +10                      | Transfer factor                      | Th2 (34)                                                |
| <b>Others</b> |                                           |                           |                          |                                      |                                                         |
| CD40LG        | CD40 ligand                               | 33 ± 7.1                  | +67                      | Surface B-cell interaction           | Required for EAU (35)<br>Diabetes (36)                  |
| RANBP5        | Importin beta3                            | 33 ± 3.5                  | +108                     | Nuclear protein transport            | ??                                                      |
| ACTB          | Actin beta                                | 49 ± 11                   | +196                     |                                      |                                                         |
| HRAS          | Oncogene                                  | 30 ± 9.8                  | -12A low expression      |                                      | ??                                                      |
| PIN1          | Isomerase                                 | 45 ± 12.1                 | +105                     |                                      | ??                                                      |

\*Percent decrease ± SD in cefuroxime-treated human CD4 T cells relative to control.

†Cellular function of gene as found in databases.

‡Based on articles linking suggested gene to Th1, Th2, or Treg pathways; data on some genes supported evidence linking the gene to more than one pathway (e.g., CCR4, CXCL10). ?? indicates unknown function in Th1/2 polarization.

- Morimoto Y, et al. (2005) Induction of surface CCR4 and its functionality in mouse Th2 cells is regulated differently during Th2 development. *J Leukoc Biol* 78(3):753–761.
- Kim SH, Cleary MM, Fox HS, Chantray D, Sarvetnick N (2002) CCR4-bearing T cells participate in autoimmune diabetes. *J Clin Invest* 110(11):1675–1686.
- Xu L, Xu W, Wen Z, Xiong S (2011) In situ prior proliferation of CD4+ CCR6+ regulatory T cells facilitated by TGF-β secreting DCs is crucial for their enrichment and suppression in tumor immunity. *PLoS ONE* 6(5):e20282.
- Kuwabara T, et al. (2009) CCR7 ligands are required for development of experimental autoimmune encephalomyelitis through generating IL-23-dependent Th17 cells. *J Immunol* 183(4):2513–2521.
- Dos Santos AC, et al. (2008) Kinin B2 receptor regulates chemokines CCL2 and CCL5 expression and modulates leukocyte recruitment and pathology in experimental autoimmune encephalomyelitis (EAE) in mice. *J Neuroinflammation* 5:49.
- Narumi S, et al. (2002) Neutralization of IFN-inducible protein 10/CXCL10 exacerbates experimental autoimmune encephalomyelitis. *Eur J Immunol* 32(6):1784–1791.
- Klein RS (2004) Regulation of neuroinflammation: The role of CXCL10 in lymphocyte infiltration during autoimmune encephalomyelitis. *J Cell Biochem* 92(2):213–222.
- Shimada A, Oikawa Y, Yamada Y, Okubo Y, Narumi S (2009) The role of the CXCL10/CXCR3 system in type 1 diabetes. *Rev Diabet Stud* 6(2):81–84.
- Han S, et al. (2005) Blockade of lymphotoxin pathway exacerbates autoimmune arthritis by enhancing the Th1 response. *Arthritis Rheum* 52(10):3202–3209.
- Liu J, et al. (1998) TNF is a potent anti-inflammatory cytokine in autoimmune-mediated demyelination. *Nat Med* 4(1):78–83.
- Menzies-Gow A, et al. (2002) Eotaxin (CCL11) and eotaxin-2 (CCL24) induce recruitment of eosinophils, basophils, neutrophils, and macrophages as well as features of early- and late-phase allergic reactions following cutaneous injection in human atopic and nonatopic volunteers. *J Immunol* 169(5):2712–2718.
- McFadden C, et al. (2007) Preferential migration of T regulatory cells induced by IL-16. *J Immunol* 179(10):6439–6445.
- Gerber DA, et al. (1995) Prolongation of murine cardiac allograft survival by microspheres containing TNF alpha and IL-1-beta neutralizing antibodies. *J Drug Target* 3(4):311–315.
- Jäger A, Dardalhon V, Sobel RA, Bettelli E, Kuchroo VK (2009) Th1, Th17, and Th9 effector cells induce experimental autoimmune encephalomyelitis with different pathological phenotypes. *J Immunol* 183(11):7169–7177.
- Tsai YG, Yang KD, Niu DM, Chien JW, Lin CY (2010) TLR2 agonists enhance CD8+Foxp3+ regulatory T cells and suppress Th2 immune responses during allergen immunotherapy. *J Immunol* 184(12):7229–7237.
- Salomon B, et al. (2000) B7/CD28 costimulation is essential for the homeostasis of the CD4+CD25+ immunoregulatory T cells that control autoimmune diabetes. *Immunity* 12(4):431–440.
- Mora C, Grewal IS, Wong FS, Flavell RA (2004) Role of L-selectin in the development of autoimmune diabetes in non-obese diabetic mice. *Int Immunol* 16(2):257–264.
- Cuenda A (2000) Mitogen-activated protein kinase kinase 4 (MKK4). *Int J Biochem Cell Biol* 32(6):581–587.
- Jaeschke A, et al. (2005) Disruption of the Jnk2 (Mapk9) gene reduces destructive insulinitis and diabetes in a mouse model of type I diabetes. *Proc Natl Acad Sci USA* 102(19):6931–6935.
- Nicolson K, et al. (2002) Induction of experimental autoimmune encephalomyelitis in the absence of c-Jun N-terminal kinase 2. *Int Immunol* 14(8):849–856.
- Deng C, et al. (2003) IL-1 receptor-associated kinase 1 regulates susceptibility to organ-specific autoimmunity. *J Immunol* 170(6):2833–2842.
- Huang Y, Li T, Sane DC, Li L (2004) IRAK1 serves as a novel regulator essential for lipopolysaccharide-induced interleukin-10 gene expression. *J Biol Chem* 279(49):51697–51703.
